# Supplementary material for: Thiopurines Analogues with Additional Ring: Synthesis, Spectroscopic Properties, and Anticancer Potency
Source: MDPI journal article supplement (doi:10.3390/ijms24108990), 2023-05-19
Supplement: s1 [file s1]

# Thiopurines analogues with additional ring: synthesis, spectroscopic properties and anticancer potency

Katarzyna Krancewicz <sup>1</sup>, Karolina Nowicka-Bauer <sup>2</sup>, Katarzyna Fiedorowicz <sup>3</sup>, Bronisław Marciniak <sup>1,2</sup> and Katarzyna Taras-Goslinska <sup>1,\*</sup>

<sup>1</sup> Faculty of Chemistry, Adam Mickiewicz University, Uniwersytetu Poznańskiego 8, 61-614 Poznań, Poland

<sup>2</sup> Centre for Advanced Technology, Adam Mickiewicz University, Uniwersytetu Poznańskiego 10, 61-614 Poznań, Poland

<sup>3</sup> Nanobiomedical Centre, Adam Mickiewicz University, Wszechnicy Piastowskiej 3, 61-614 Poznań, Poland

\* Correspondence: karem@amu.edu.pl

## <sup>1</sup>H NMR and <sup>13</sup>C NMR of compounds

### Content:

1. <sup>1</sup>H and <sup>13</sup>C NMR spectra of TEGuo (Figs S1–S2)
2. <sup>1</sup>H spectrum of TEGua (Fig. S3)
3. <sup>1</sup>H and <sup>13</sup>C NMR spectra of 6-Me-TEGuo (Figs S4–S5)
4. <sup>1</sup>H spectrum of 6-Me-TEGua (Fig. S6)
5. <sup>1</sup>H and <sup>13</sup>C NMR spectra of 6-Me-TEG (Figs S7–S8)

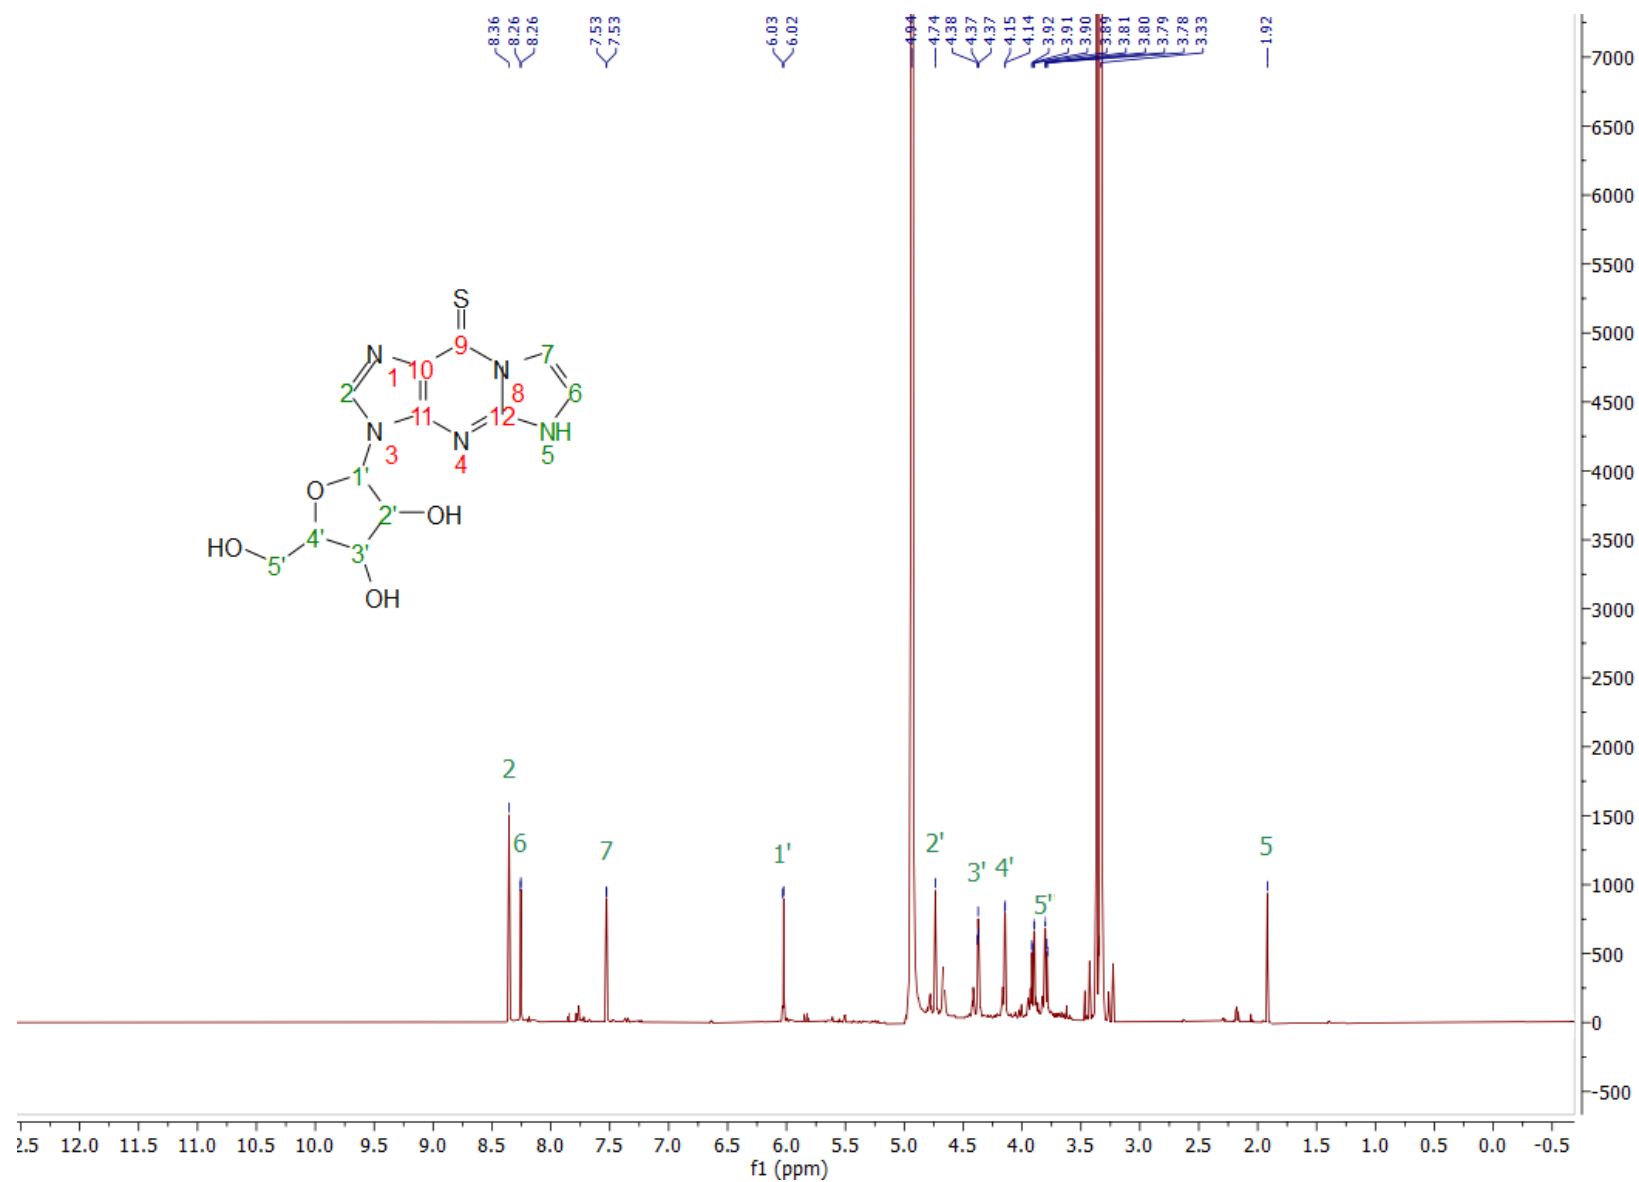

Figure S1. <sup>1</sup>H NMR spectrum (MeOD) of TEGuo.

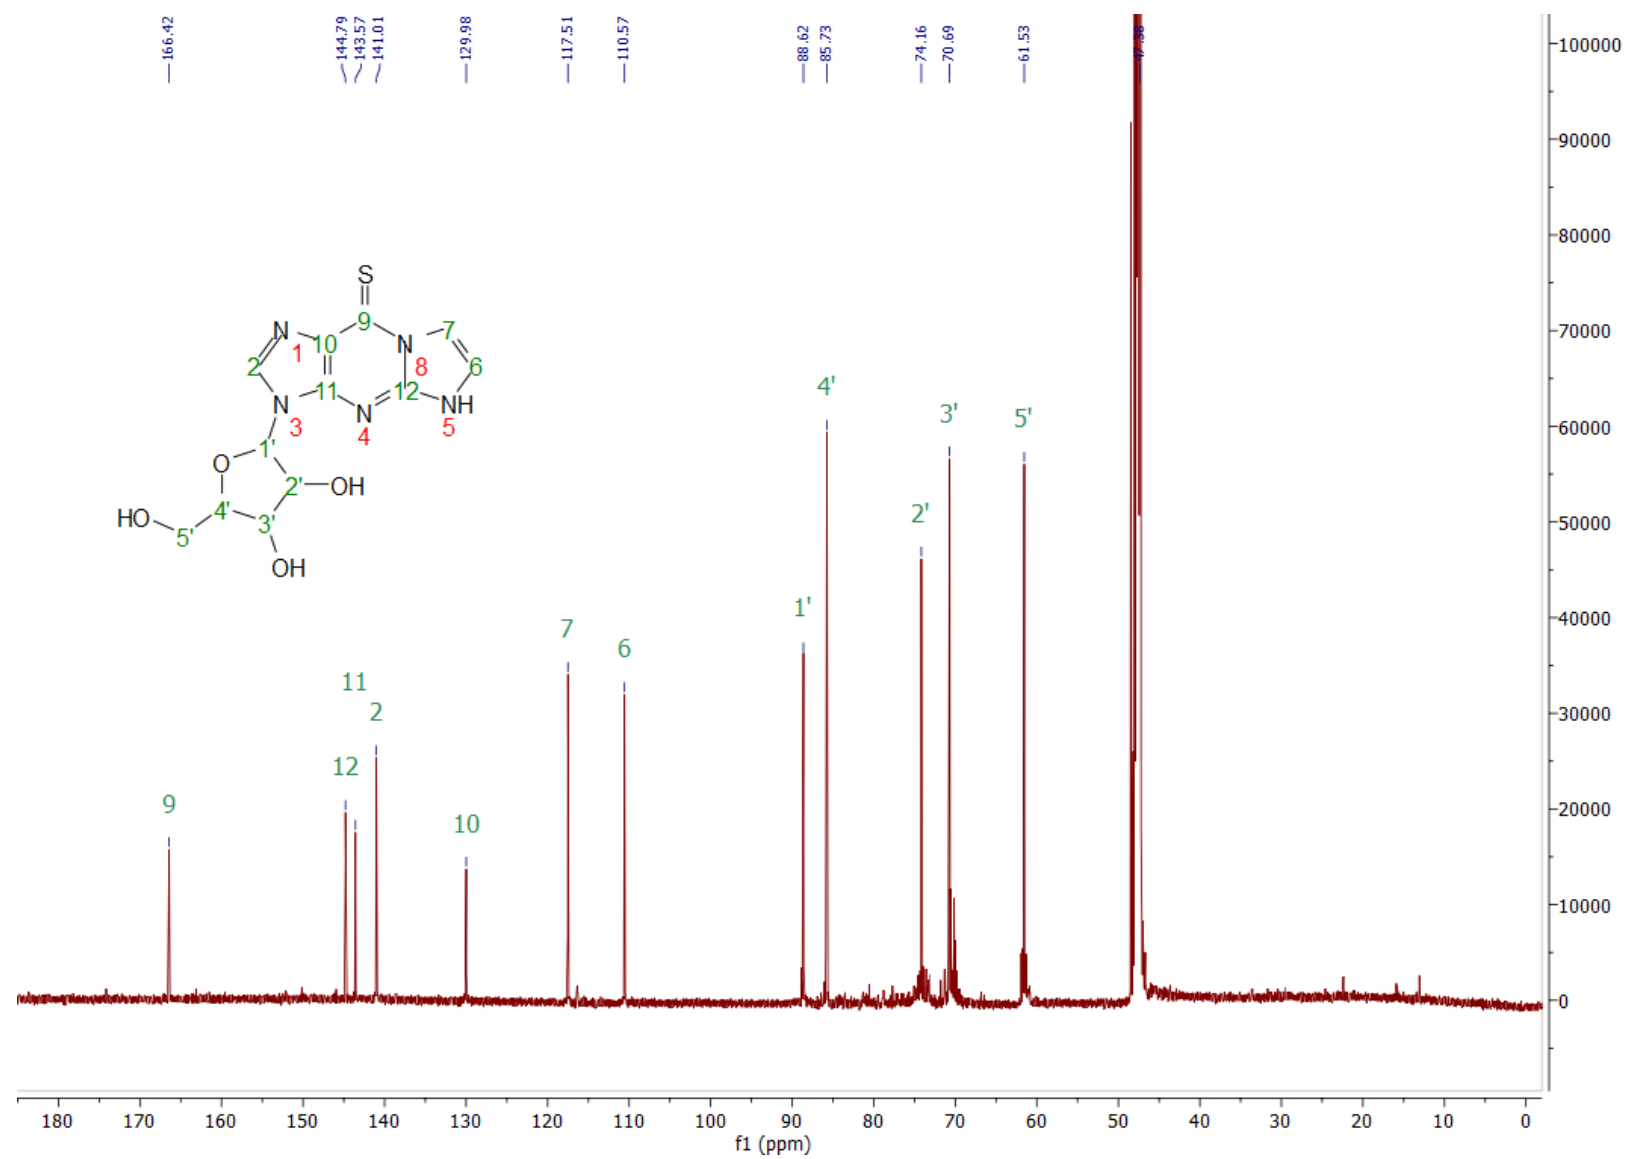

**Figure S2.**  $^{13}\text{C}$  NMR spectrum ( $\text{MeOD}$ ) of TEGuo.

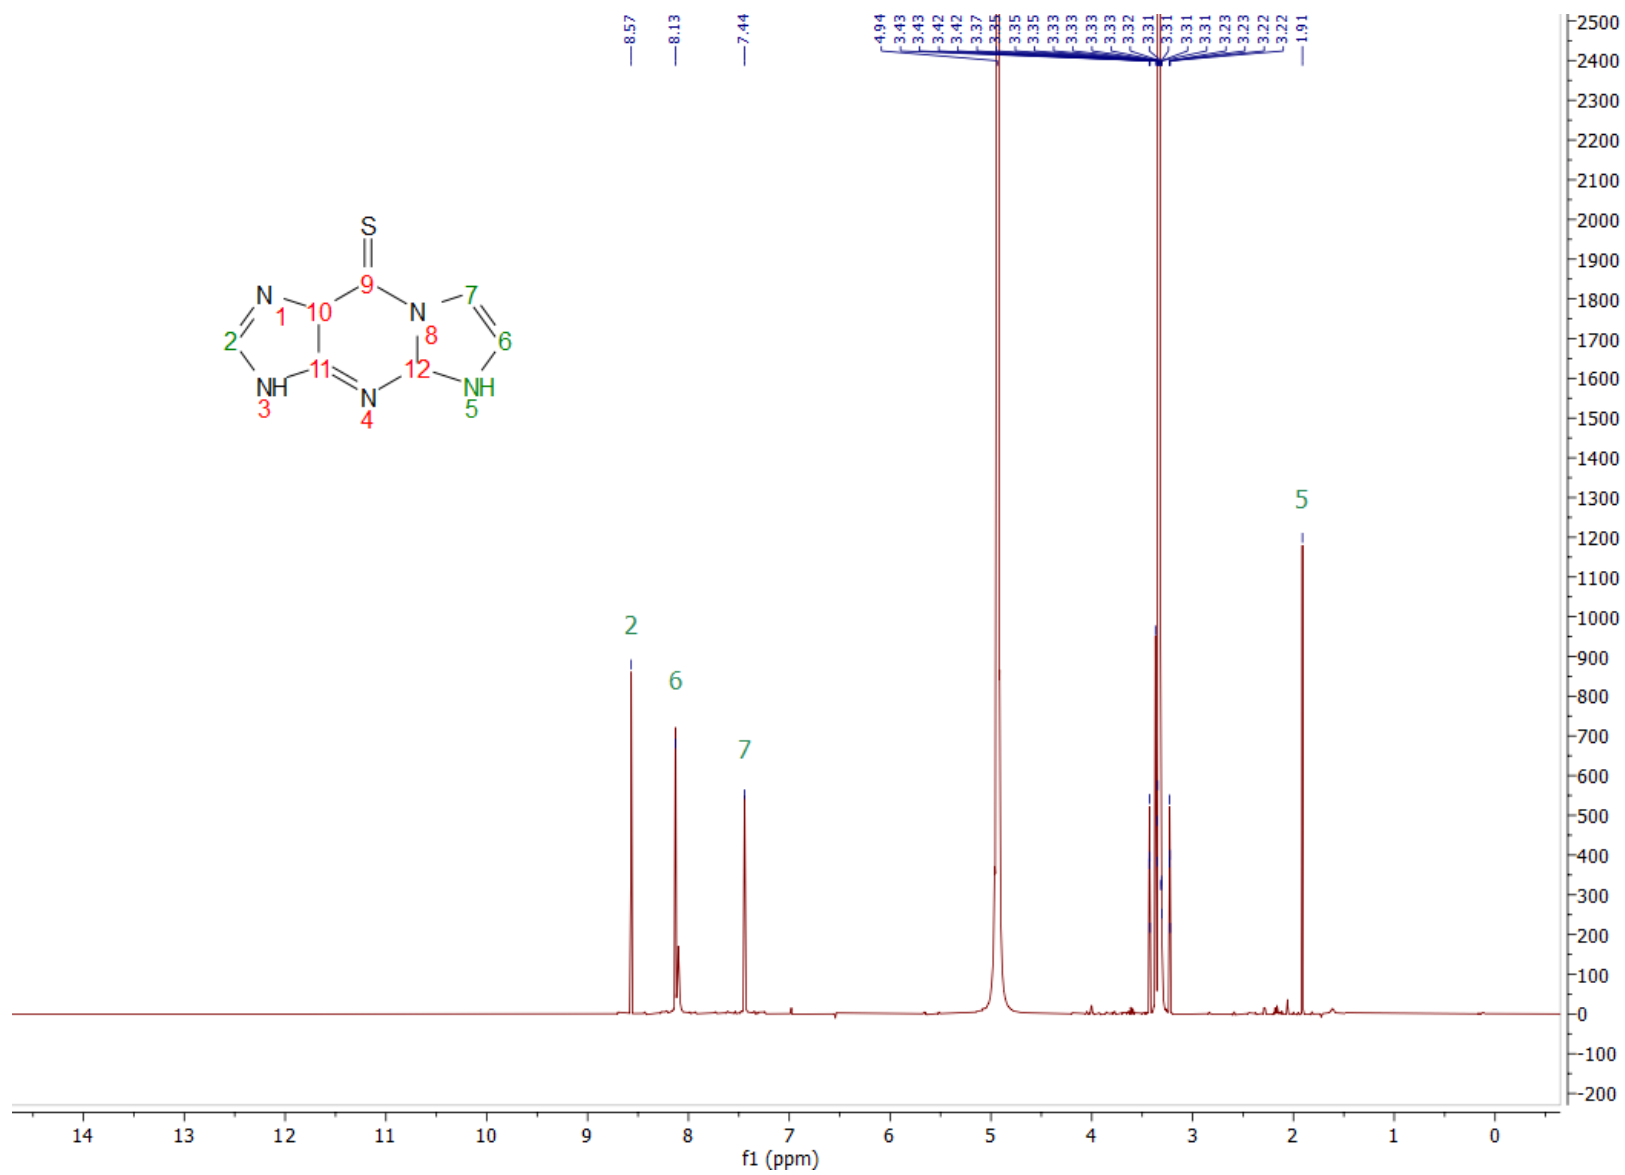

**Figure S3.**  $^1\text{H}$  NMR spectrum ( $\text{MeOD}$ ) of TEGua.

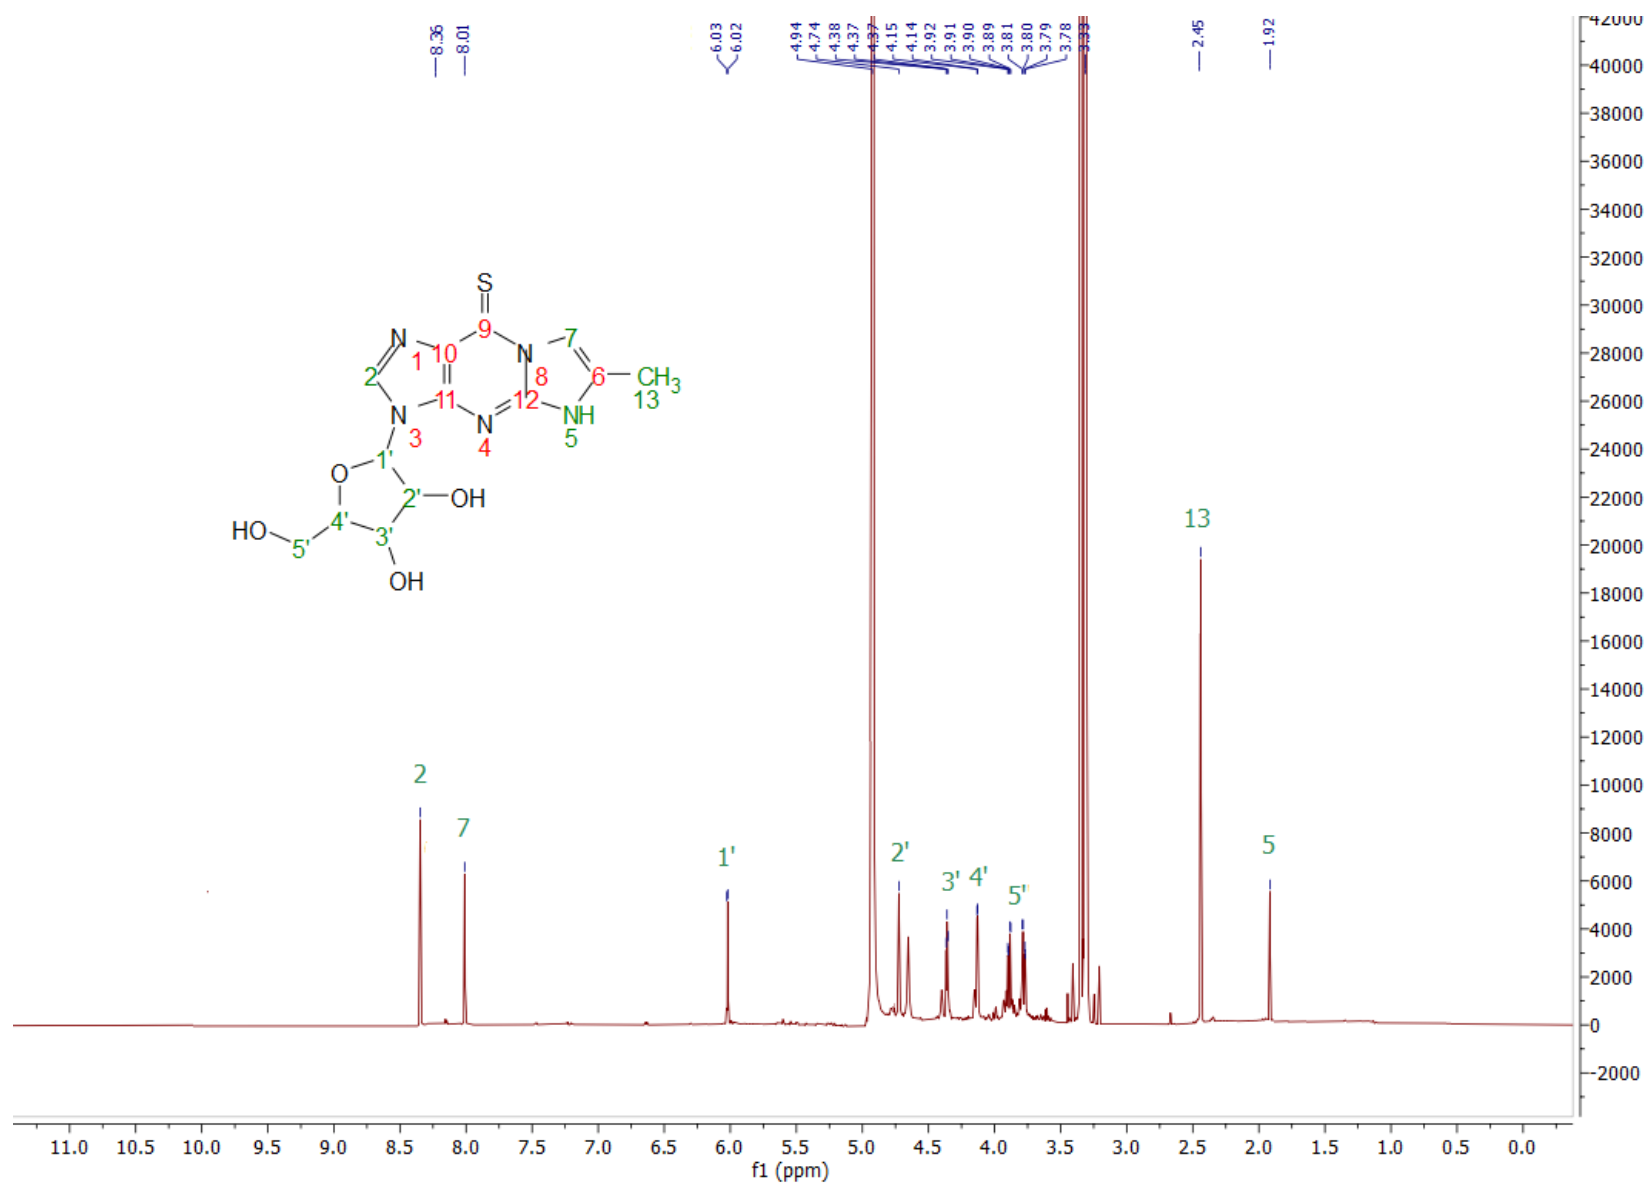

**Figure S4.** <sup>1</sup>H NMR spectrum (MeOD) of 6-Me-TEGuo.

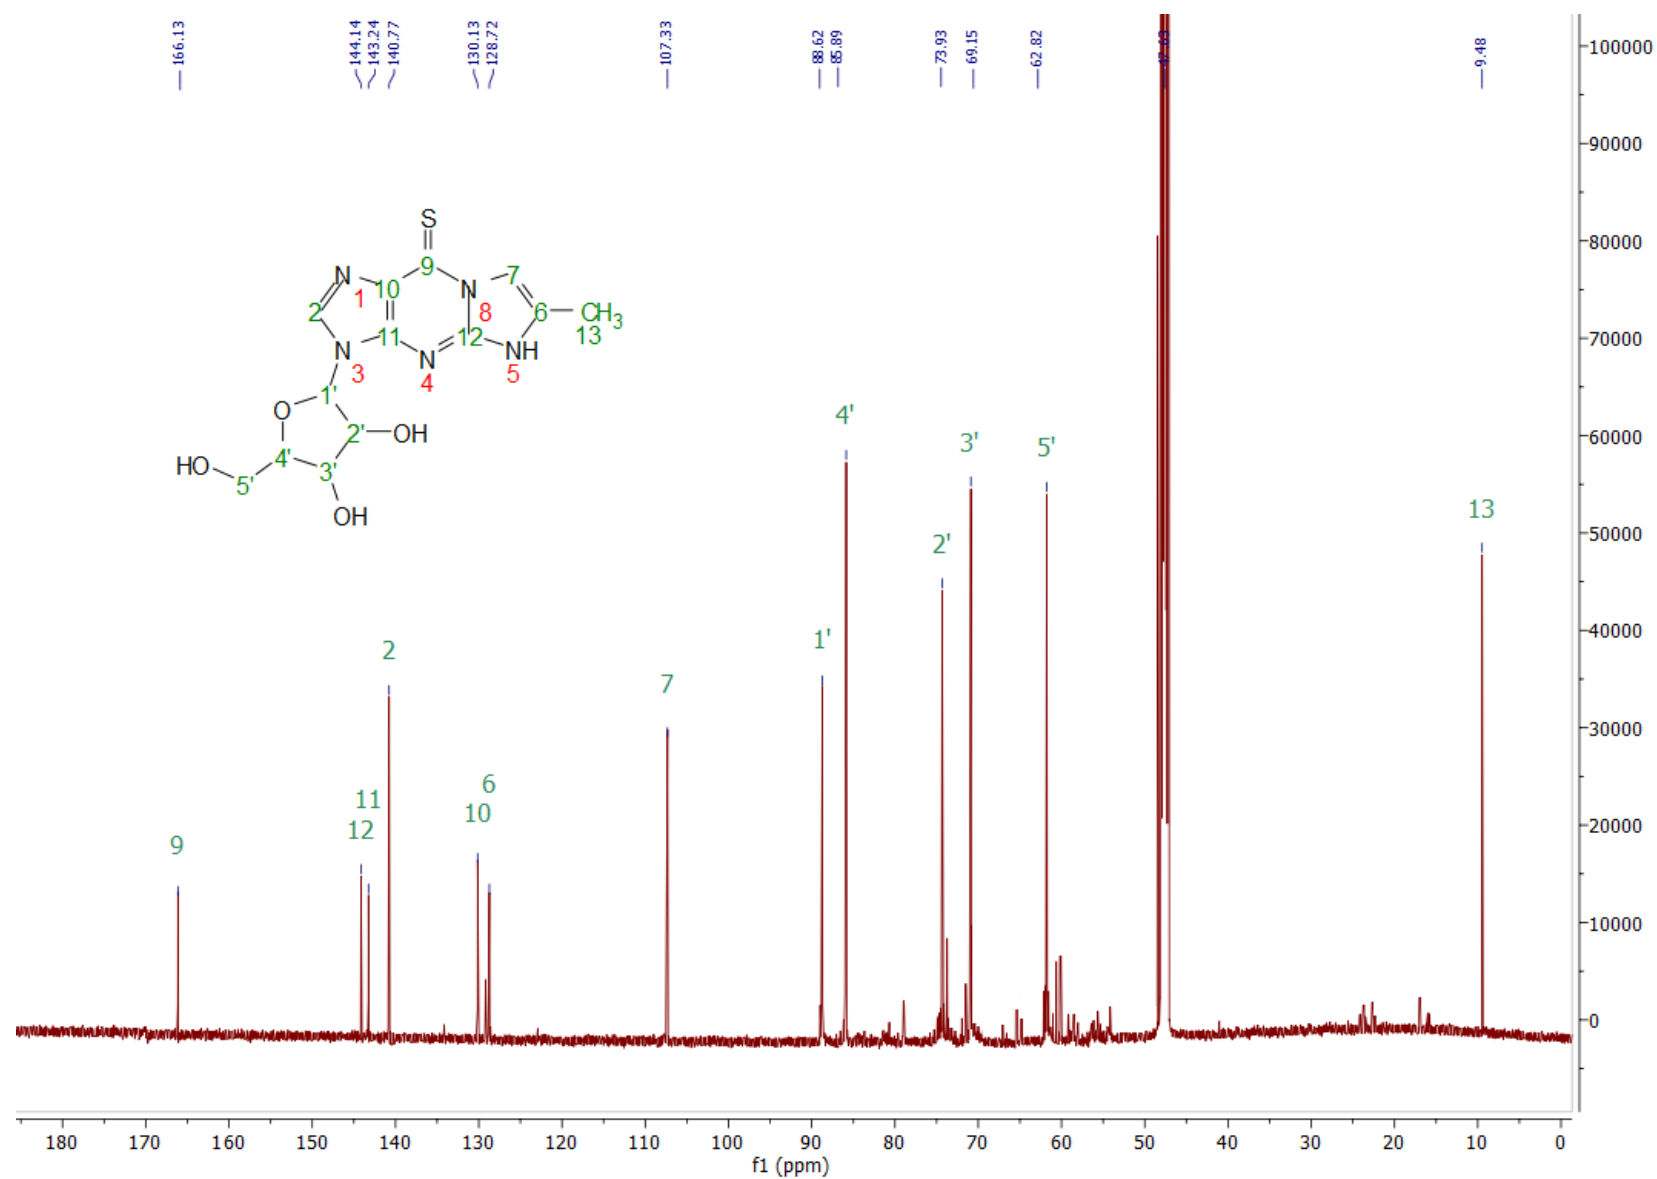

**Figure S5.** <sup>13</sup>C NMR spectrum (MeOD) of 6-Me-TEGuo.

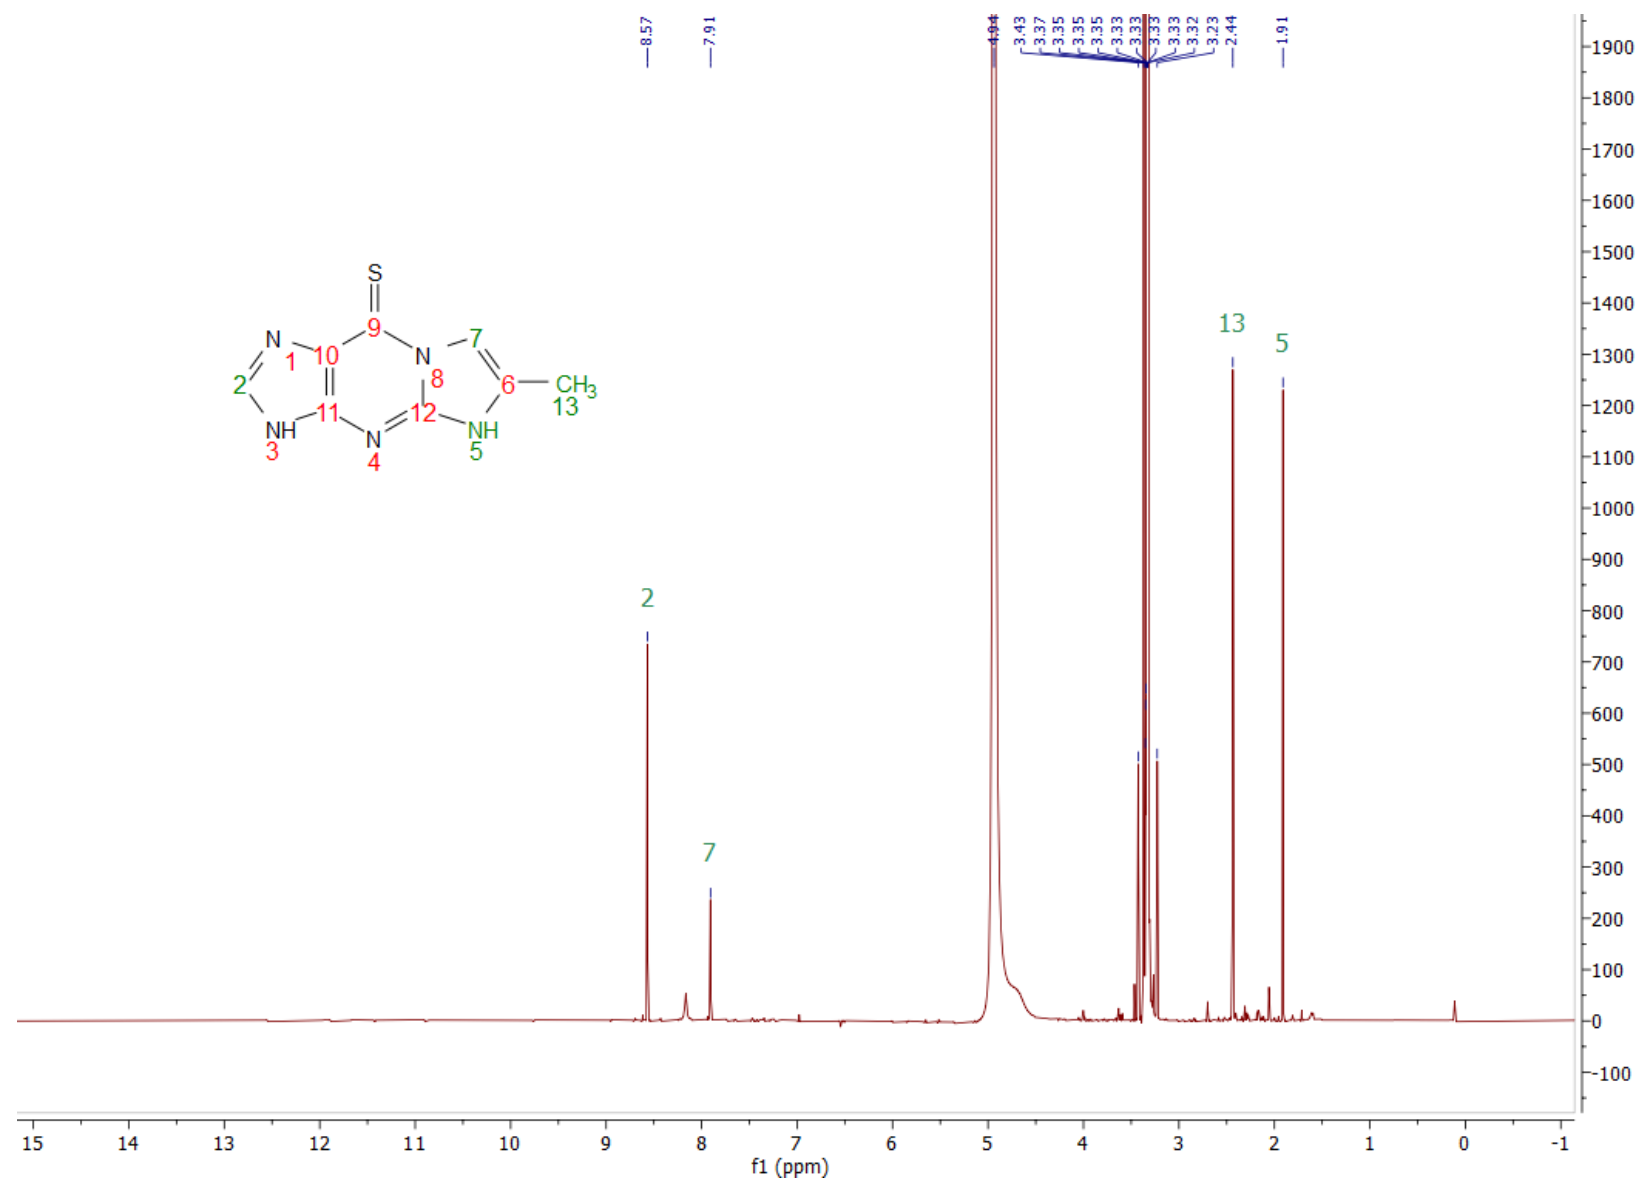

Figure S6. <sup>1</sup>H NMR spectrum (MeOD) of 6-Me-TEGua.

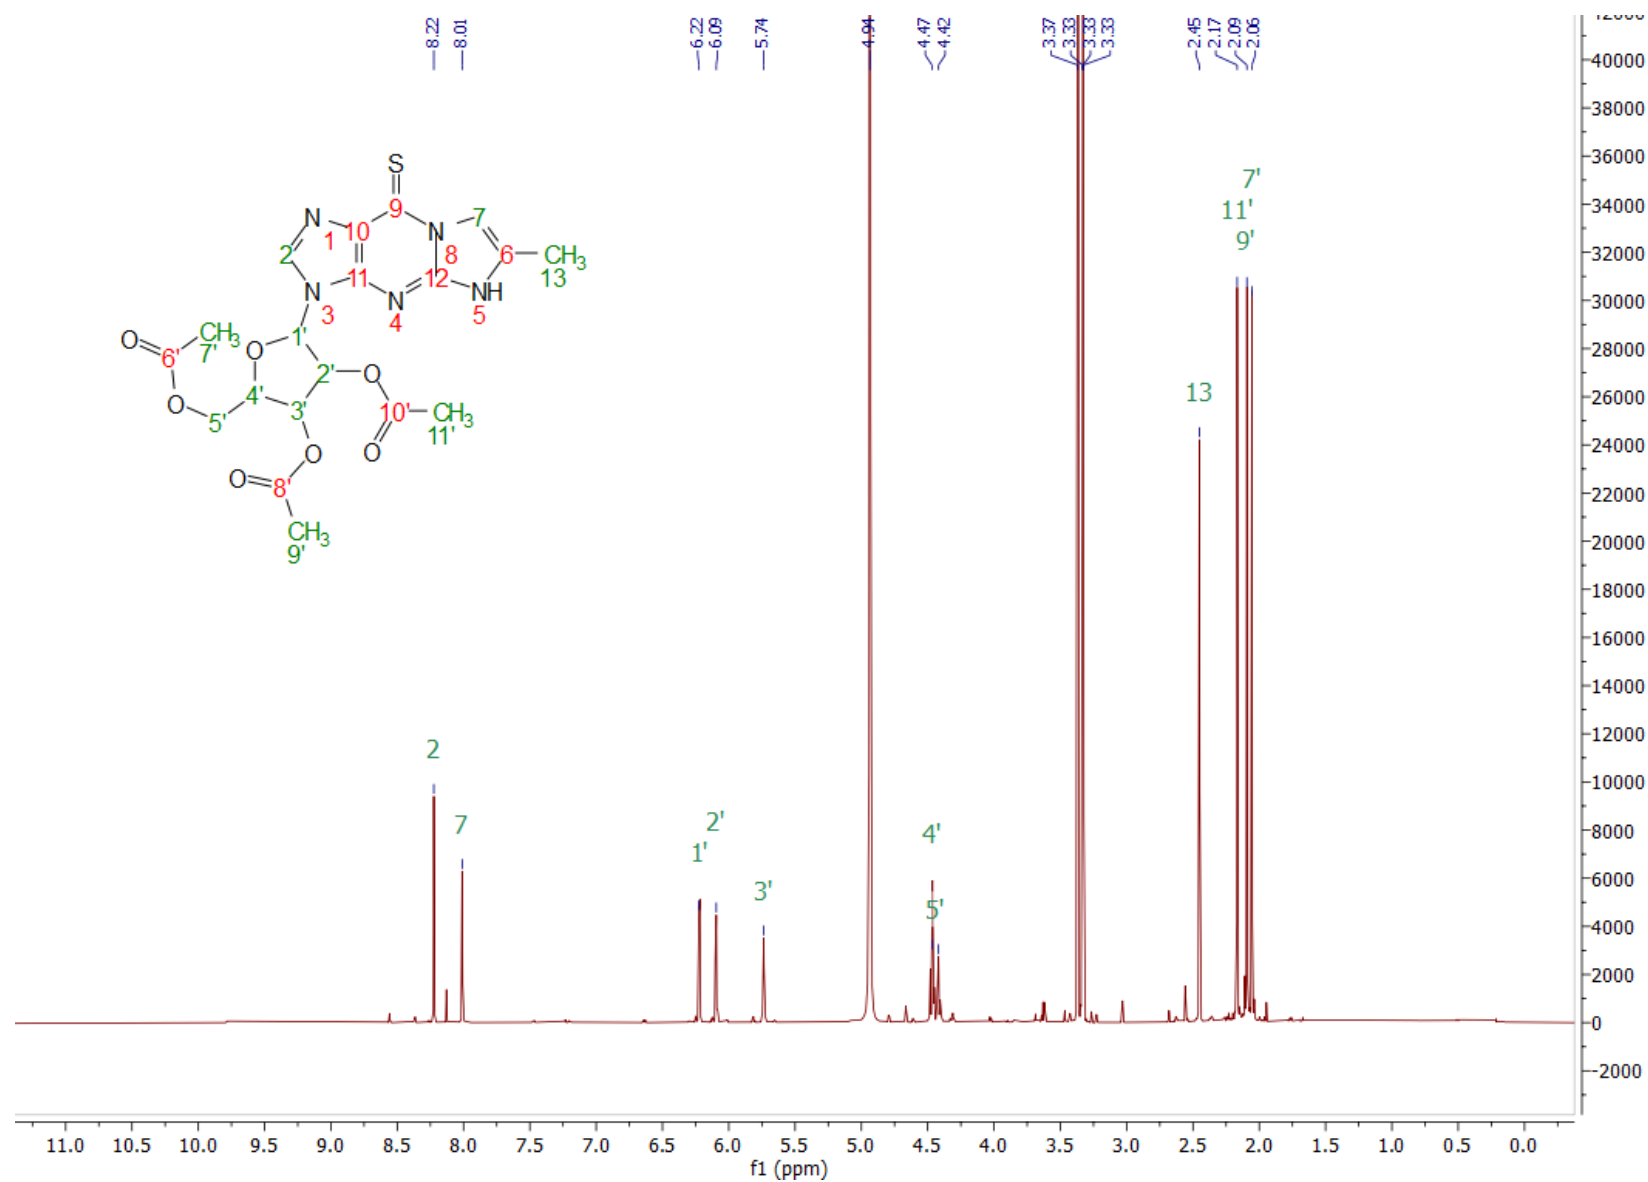

Figure S7. <sup>1</sup>H NMR spectrum (MeOD) of 6-Me-TEG.



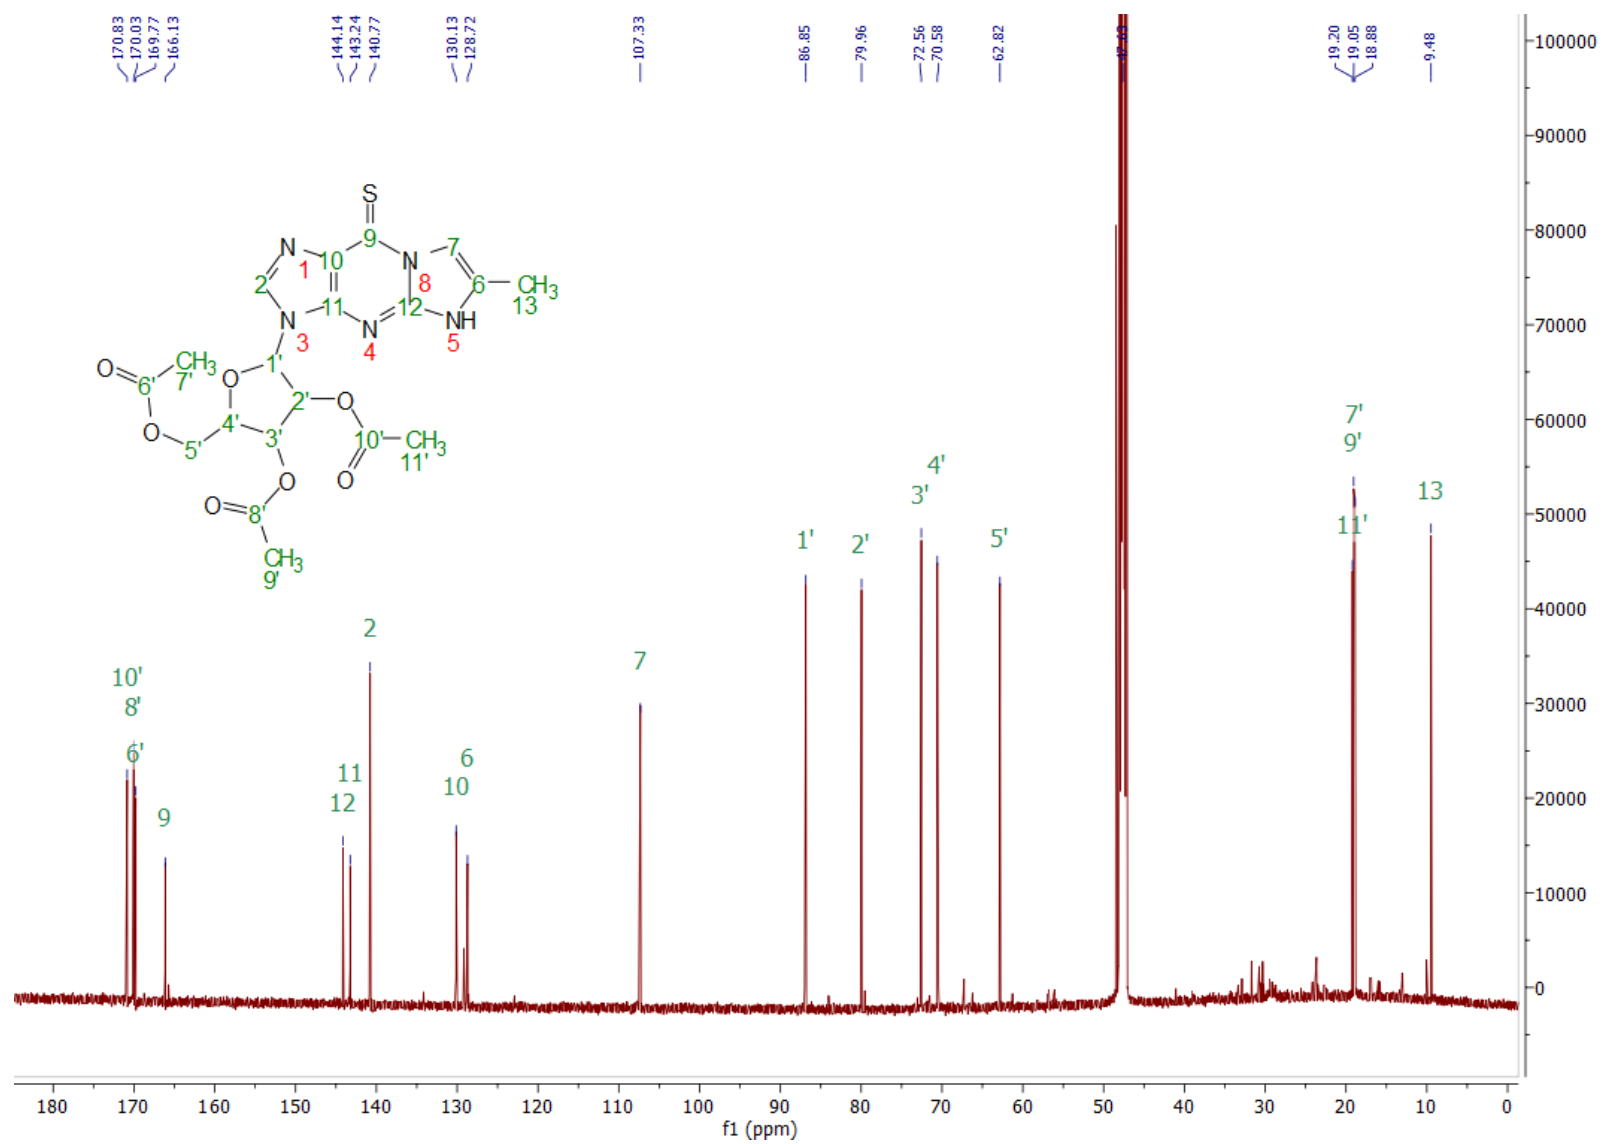

**Figure S8.** <sup>13</sup>C NMR spectrum (MeOD) of 6-Me-TEG.
